# Supplementary material for: BAM15‐mediated mitochondrial uncoupling protects against obesity and improves glycemic control
Source: PubMed Central journal article supplement (PMC7338798; doi:10.15252/emmm.202012088), 2020-06-10

# Source Data - Figure 3A

|                |   |   |   |   |   |   |
|----------------|---|---|---|---|---|---|
| BAM15          | - | - | - | + | + | + |
| 0.5 uM Insulin | - | + | - | - | + | - |
| 1 uM Insulin   | - | - | + | - | - | + |

Replicate Experiment

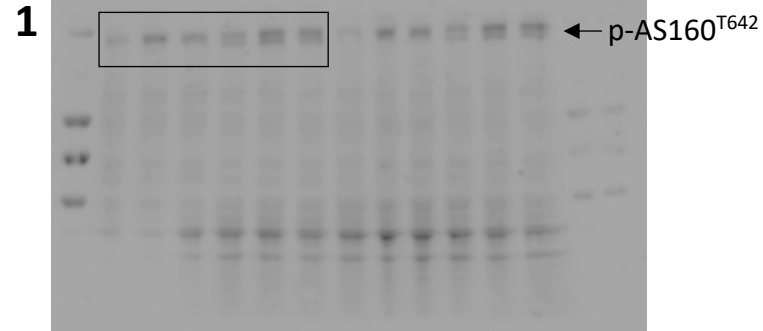

|                |   |   |   |   |   |   |
|----------------|---|---|---|---|---|---|
| BAM15          | - | - | - | + | + | + |
| 0.5 uM Insulin | - | + | - | - | + | - |
| 1 uM Insulin   | - | - | + | - | - | + |

Replicate Experiment

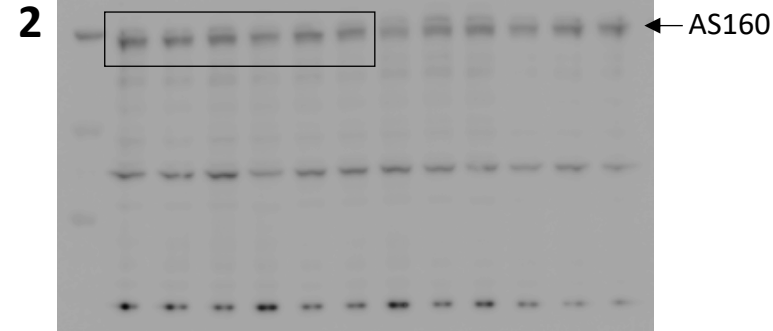

|                |   |   |   |   |   |   |
|----------------|---|---|---|---|---|---|
| BAM15          | - | - | - | + | + | + |
| 0.5 uM Insulin | - | + | - | - | + | - |
| 1 uM Insulin   | - | - | + | - | - | + |

Replicate Experiment

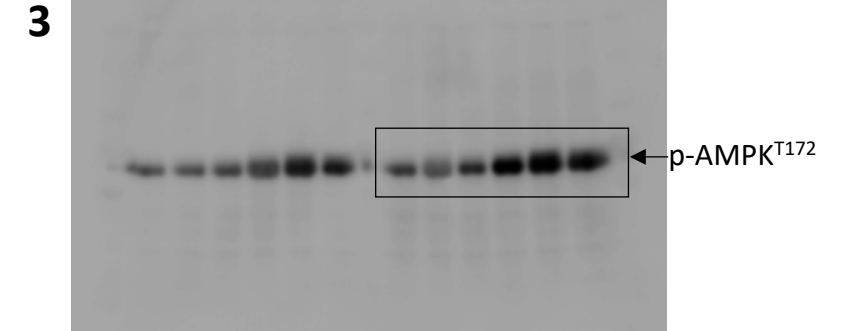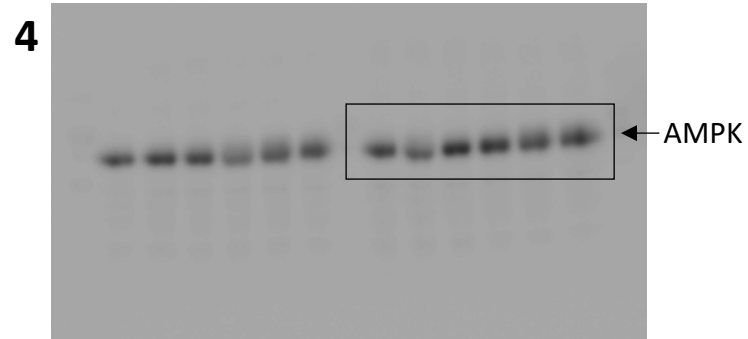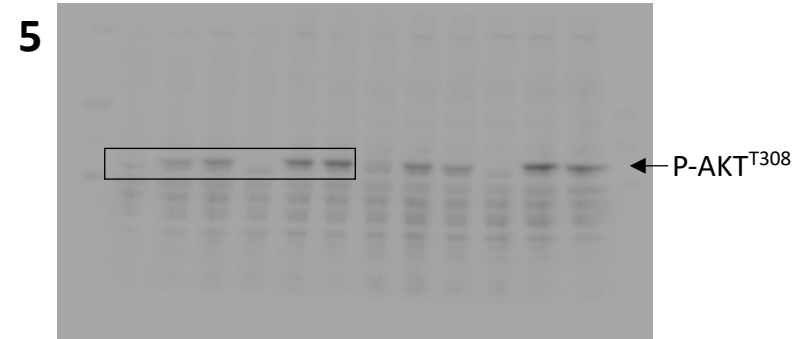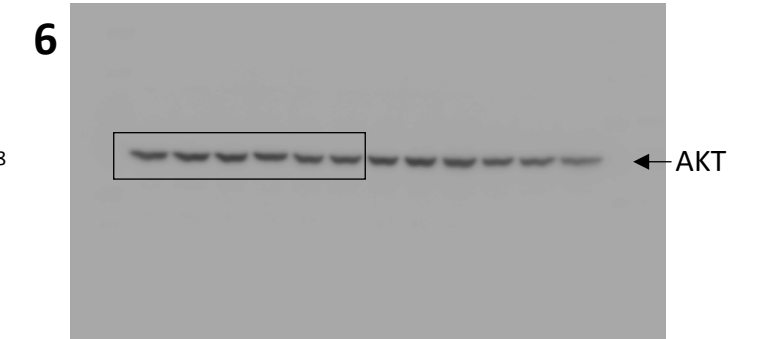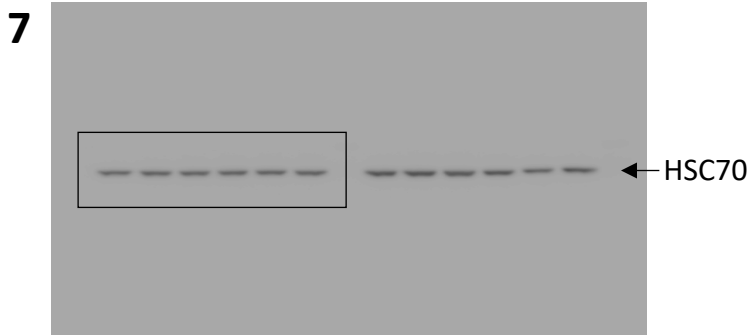

# Source Data - Figure 3E

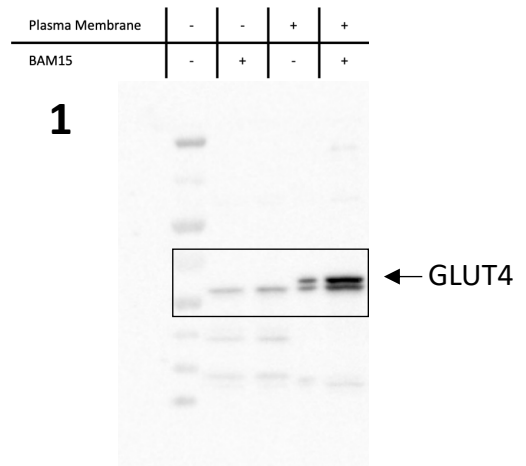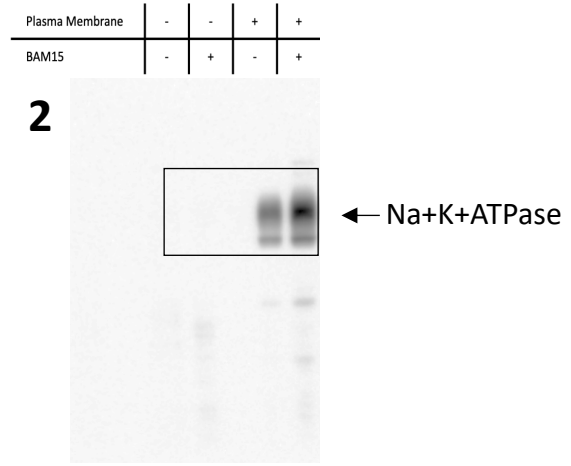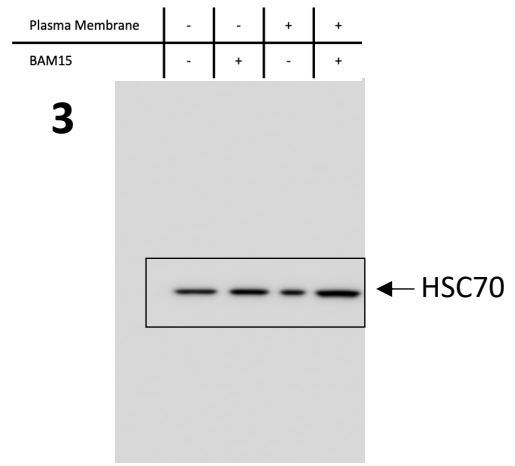

Source Data - Figure 3I

shAMPK | - | - | + | + Replicate Experiment

1

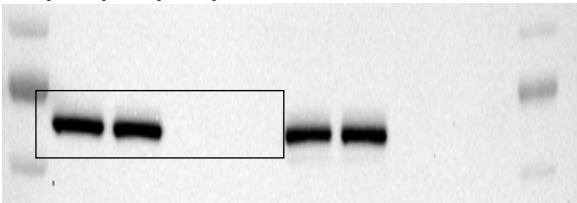

← AMPK

shAMPK | - | - | + | + Replicate Experiment

2

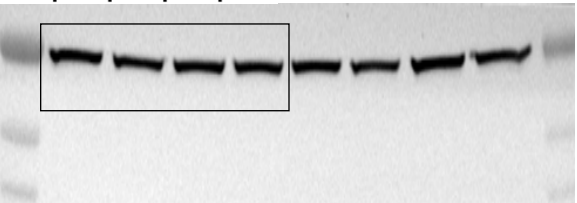

← HSC70

# Source Data - Figure 3M

|         |   |   |   |   |   |   |   |   |
|---------|---|---|---|---|---|---|---|---|
| shAMPK  | - | - | - | - | + | + | + | + |
| BAM15   | - | - | + | + | - | - | + | + |
| Insulin | - | + | - | + | - | + | - | + |

|         |   |   |   |   |   |   |   |   |
|---------|---|---|---|---|---|---|---|---|
| shAMPK  | - | - | - | - | + | + | + | + |
| BAM15   | - | - | + | + | - | - | + | + |
| Insulin | - | + | - | + | - | + | - | + |

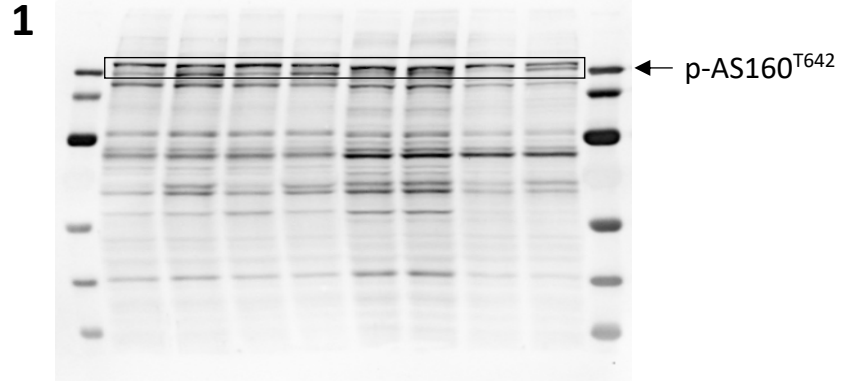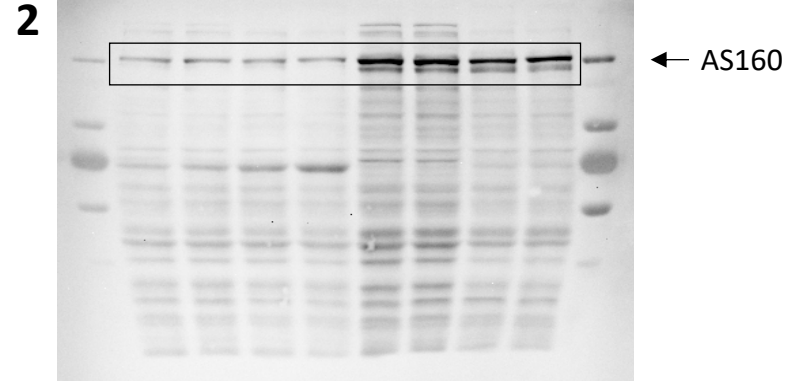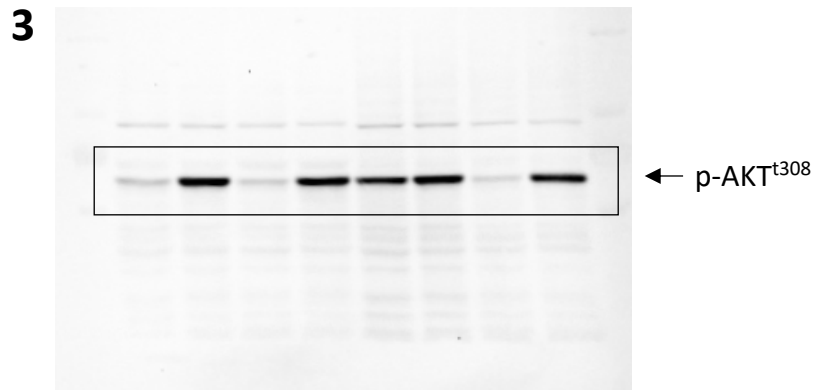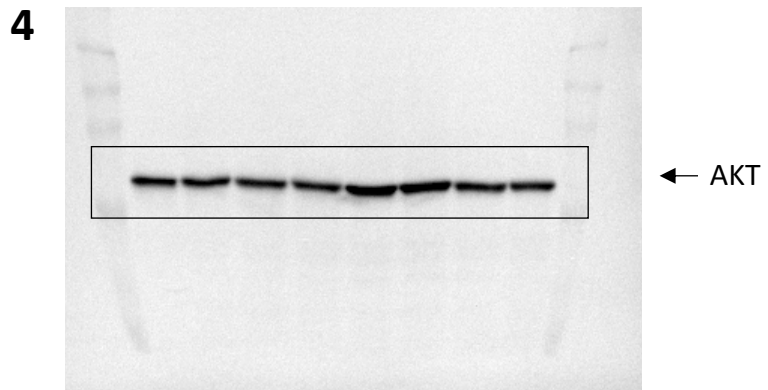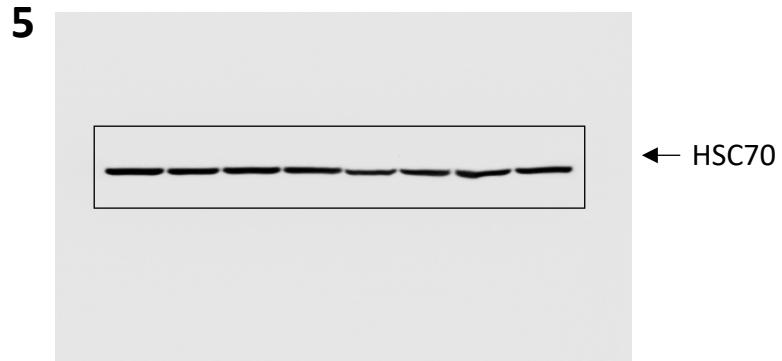

Supplement: EMMM-12-e12088-s003.pdf [file EMMM-12-e12088-s003.pdf]
