# Supplementary material for: BAM15‐mediated mitochondrial uncoupling protects against obesity and improves glycemic control
Source: PubMed Central journal article supplement (PMC7338798; doi:10.15252/emmm.202012088), 2020-06-10
Supplement: EMMM-12-e12088-s001.pdf [file EMMM-12-e12088-s001.pdf]

## APPENDIX

### **BAM15 Mediated Mitochondrial Uncoupling Protects Against Obesity and Improves Glycemic Control**

Christopher L. Axelrod, William T. King, Gangarao Davuluri, Robert C. Noland, Jacob Hall, Michaela Hull, Wagner S. Dantas, Elizabeth R.M. Zunica, Stephanie J. Alexopoulos, Kyle L. Hoehn, Ingeborg Langohr, Krisztian Stadler, Haylee Doyle, Eva Schmidt, Stephan Nieuwoudt, Kelly Fitzgerald, Kathryn Pergola, Hisashi Fujioka, Jacob T. Mey, Ciaran Fealy, Anny Mulya, Robbie Beyl, Charles L. Hoppel, and John P. Kirwan

#### **Table of Contents**

**Appendix Figure S1.** Related to Figure 7. Increased skeletal muscle fatty acid oxidation is supported by AMPK mediated suppression of lipogenesis in white adipose tissue following treatment with BAM15.

**Appendix Table S1.** Related to Figures 1 and 7. qRT-PCR primer sequences.

**CTRL**

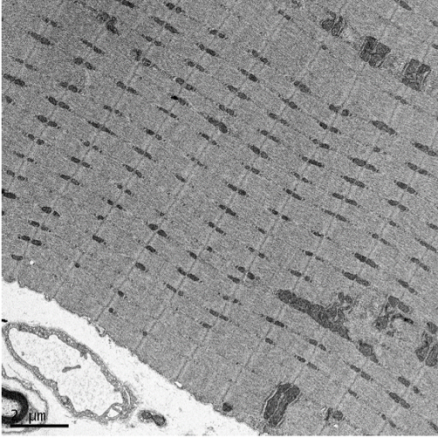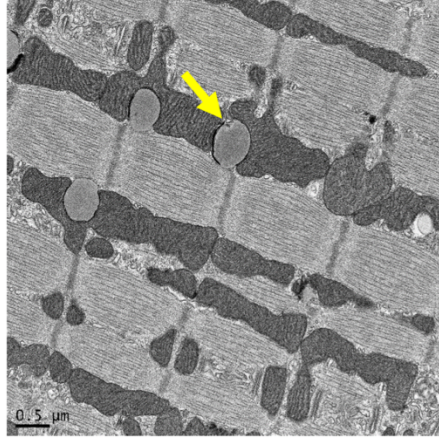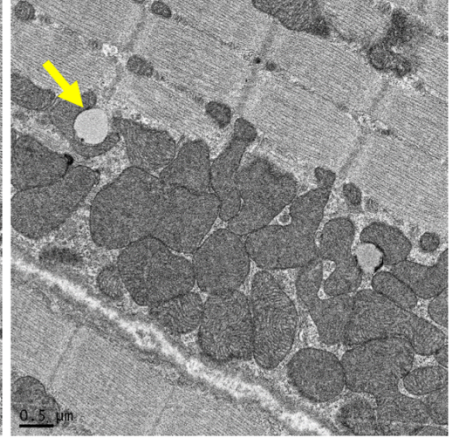

**BAM15**

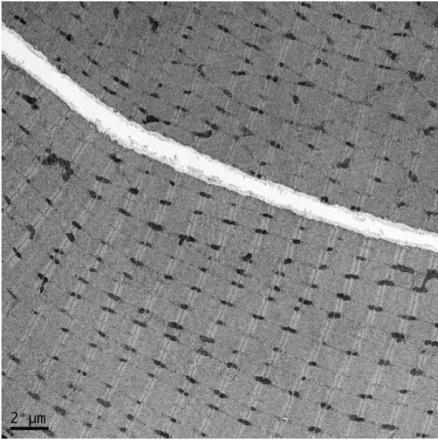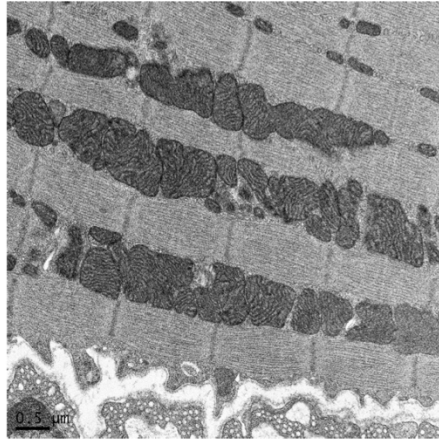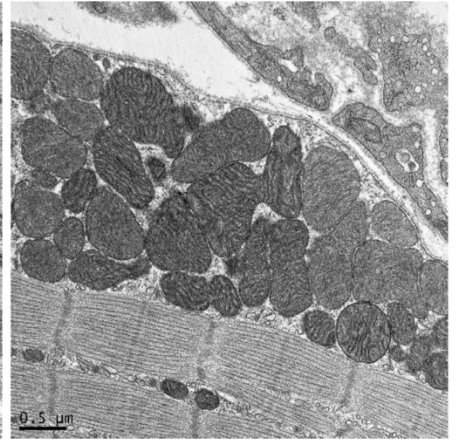

### **Appendix Figure S1.**

Representative transmission electron microscopy (TEM) from of phosphate-buffered aldehyde-DMSO immersed tissue sections. Left: 2  $\mu\text{m}$  sections of predominantly white gastrocnemius muscle. Center: 0.5  $\mu\text{m}$  sections of intermyofibrillar mitochondria from red gastrocnemius muscle. Right: 0.5  $\mu\text{m}$  sections of subsarcolemmal mitochondria from red gastrocnemius muscle. Yellow arrow denotes identification of a lipid droplet.

**Appendix Table S1.** qRT-PCR primer sequences.

| <b>Probe</b> | <b>5'→3' Forward Primer</b> | <b>5'→3' Reverse Primer</b> |
|--------------|-----------------------------|-----------------------------|
| Pparg        | GTACTGTTCGGTTTCAGAAGTGCC    | ATCTCCGCCAACAGCTTCTCCT      |
| Lpl          | CCA ATG GAG GCA CTT TCC A   | CCACGTCTCCGAGTCCTCTCT       |
| Pnpla2       | TGTGGCCTCATTCTCCTAC         | TCGTGGATGTTGGTGGAGCT        |
| Lipe         | GGAGCACTACAAACGCAACGA       | TCGGCCACCGGTAAAGAG          |
| Acaca        | CTGGCTGCATCCATTATGTCA       | TGGTAGACTGCCCGTGTGAA        |
| Acacb        | AGAAGCGAGCACTGCAAGGTTG      | GGAAGATGGACTCCACCTGGTT      |
| Scd1         | GCAAGCTCTACACCTGCCTCT T     | CGTGCCTTGTAAGTTCTGTGGC      |
| Mlxipl       | GAGTGCTTGAGCCTG GCTTACA     | GCTCTCCAGATGGCGTTGTTCA      |
| Srebfl       | CGACTACATCCGCTTCTTGCA       | CCTCCATAGACACATCTGTGCC      |
| Fasn         | TCCTGGAACGAGAACACGATCT      | GAGACGTGTCACTCCTGGACTTG     |
| 18s          | TAGAGGGACAAGTGGCGTTC        | CGCTGAGCCAGTCAGTGT          |
| Cox2         | GCCGACTAAATCAAGCAACA        | CAATGGGCATAAAGCTATGG        |
