# Supplementary material for: BAM15‐mediated mitochondrial uncoupling protects against obesity and improves glycemic control
Source: PubMed Central journal article supplement (PMC7338798; doi:10.15252/emmm.202012088), 2020-06-10
Supplement: EMMM-12-e12088-s002.pdf [file EMMM-12-e12088-s002.pdf]

## Expanded View Figures

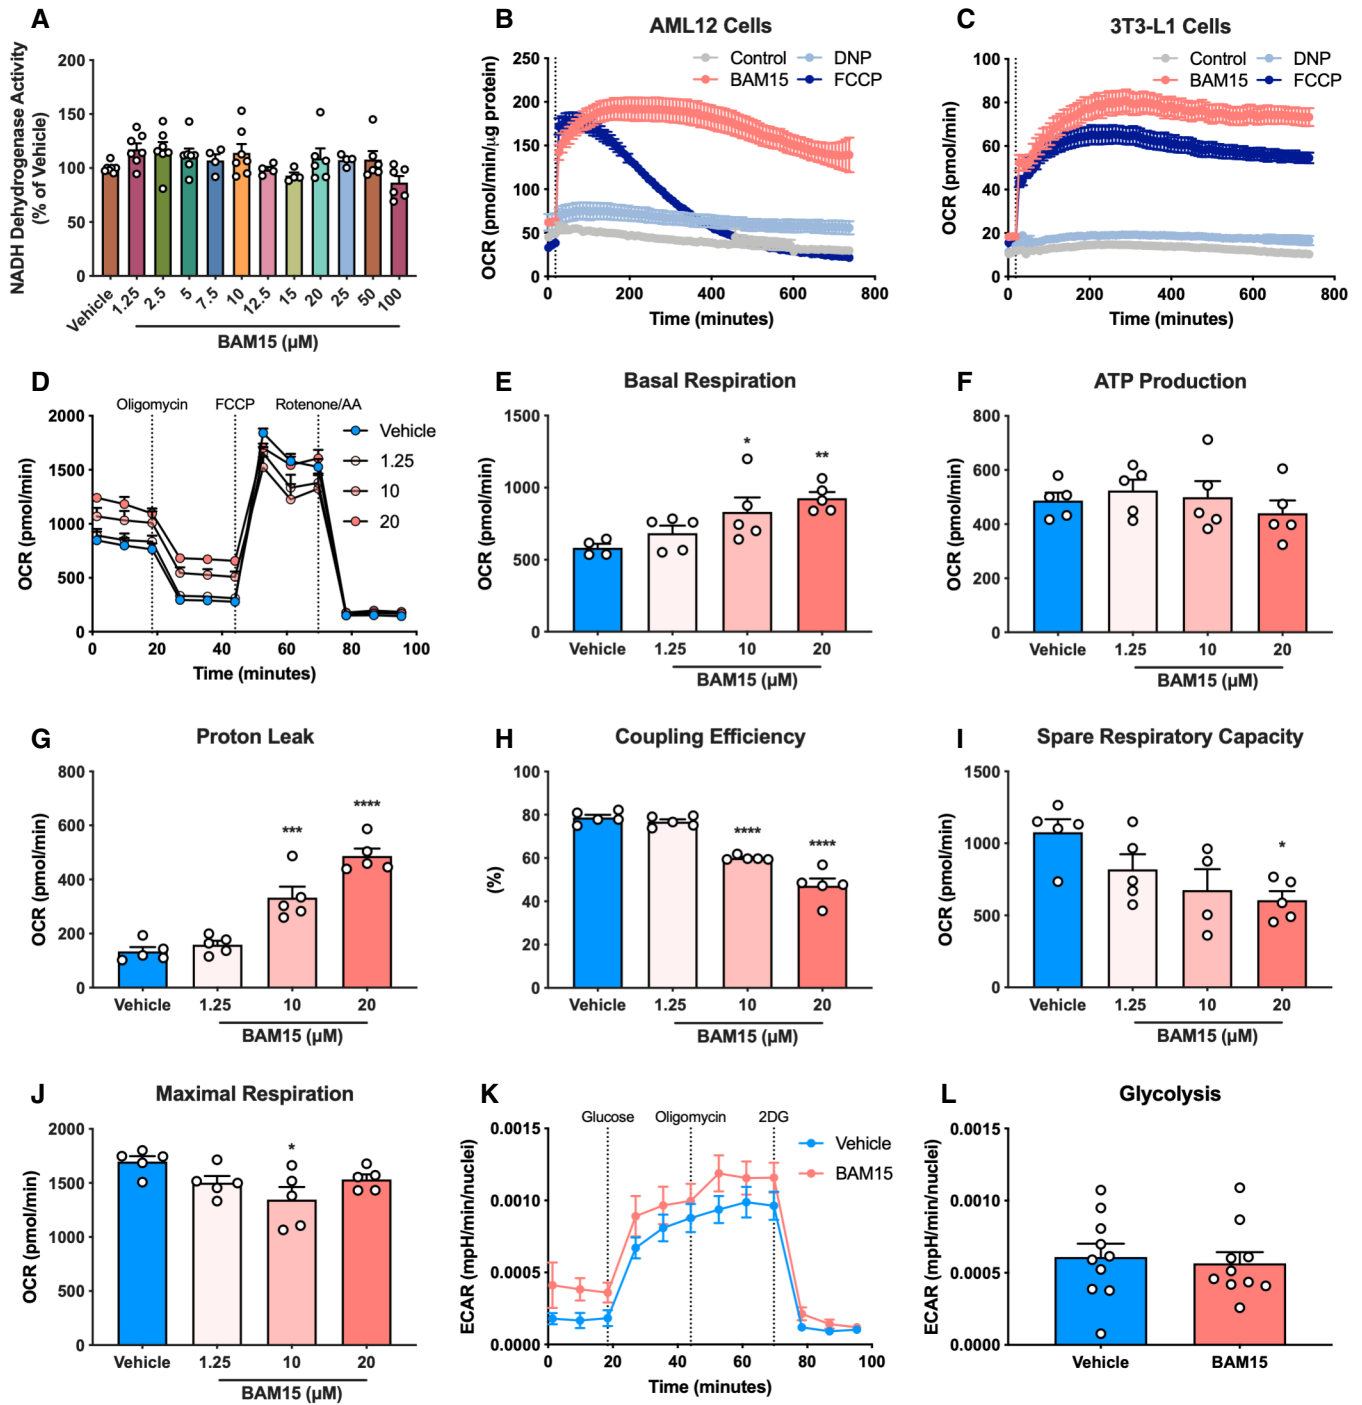

Figure EV1.

**Figure EV1. Related to Fig 1. BAM15 improves cellular respiratory kinetics by sustained mitochondrial uncoupling.**

- A NADH dehydrogenase activity in C2C12 cells following 16-h treatment with varying concentrations of BAM15 ( $\mu\text{M}$ ) ( $N = 7$  per condition).
- B, C (B) Mitochondrial respiratory kinetics following acute injection of 1  $\mu\text{M}$  BAM15, FCCP, or DNP into AML12 hepatocytes and (C) 3T3-L1 adipocytes ( $N = 5$  per condition).
- D–J Assessment of intact oxygen consumption rates (OCR) in C2C12 cells after serial injection of oligomycin, FCCP, and a cocktail of rotenone and antimycin A following overnight incubation with 0 (vehicle; 0.01% DMSO), 1.25, 10, or 20  $\mu\text{M}$  BAM15 ( $N = 5$  per condition). Basal: vehicle versus 10  $\mu\text{M}$ :  $P = 0.037$ , vehicle versus 20  $\mu\text{M}$ :  $P = 0.0072$ . Proton leak: vehicle versus 10  $\mu\text{M}$ :  $P = 0.0002$ , vehicle versus 20  $\mu\text{M}$ :  $P < 0.0001$ . Coupling efficiency: vehicle versus 10  $\mu\text{M}$ :  $P < 0.0001$ , vehicle versus 20  $\mu\text{M}$ :  $P < 0.0001$ . Spare respiratory capacity: vehicle versus 20  $\mu\text{M}$ :  $P = 0.0179$ . Maximal respiration: vehicle versus 10  $\mu\text{M}$ :  $P = 0.0192$ .
- K, L Assessment of intact extracellular acidification rates (ECAR) in C2C12 cells after serial injection of glucose, oligomycin, and 2-deoxyglucose after 16-h treatment with 0 (vehicle; 0.01% DMSO) or 20  $\mu\text{M}$  BAM15 ( $N = 10$  per condition).

Data information: Data are shown as the mean  $\pm$  SEM. \* $P < 0.05$ , \*\*\* $P < 0.01$ , \*\*\*\* $P < 0.001$ . Comparisons of treatment  $\times$  time were assessed by one-way repeated-measures ANOVA with Tukey's multiple comparisons. Comparisons of treatment alone were assessed by an unpaired Student's  $t$ -test.

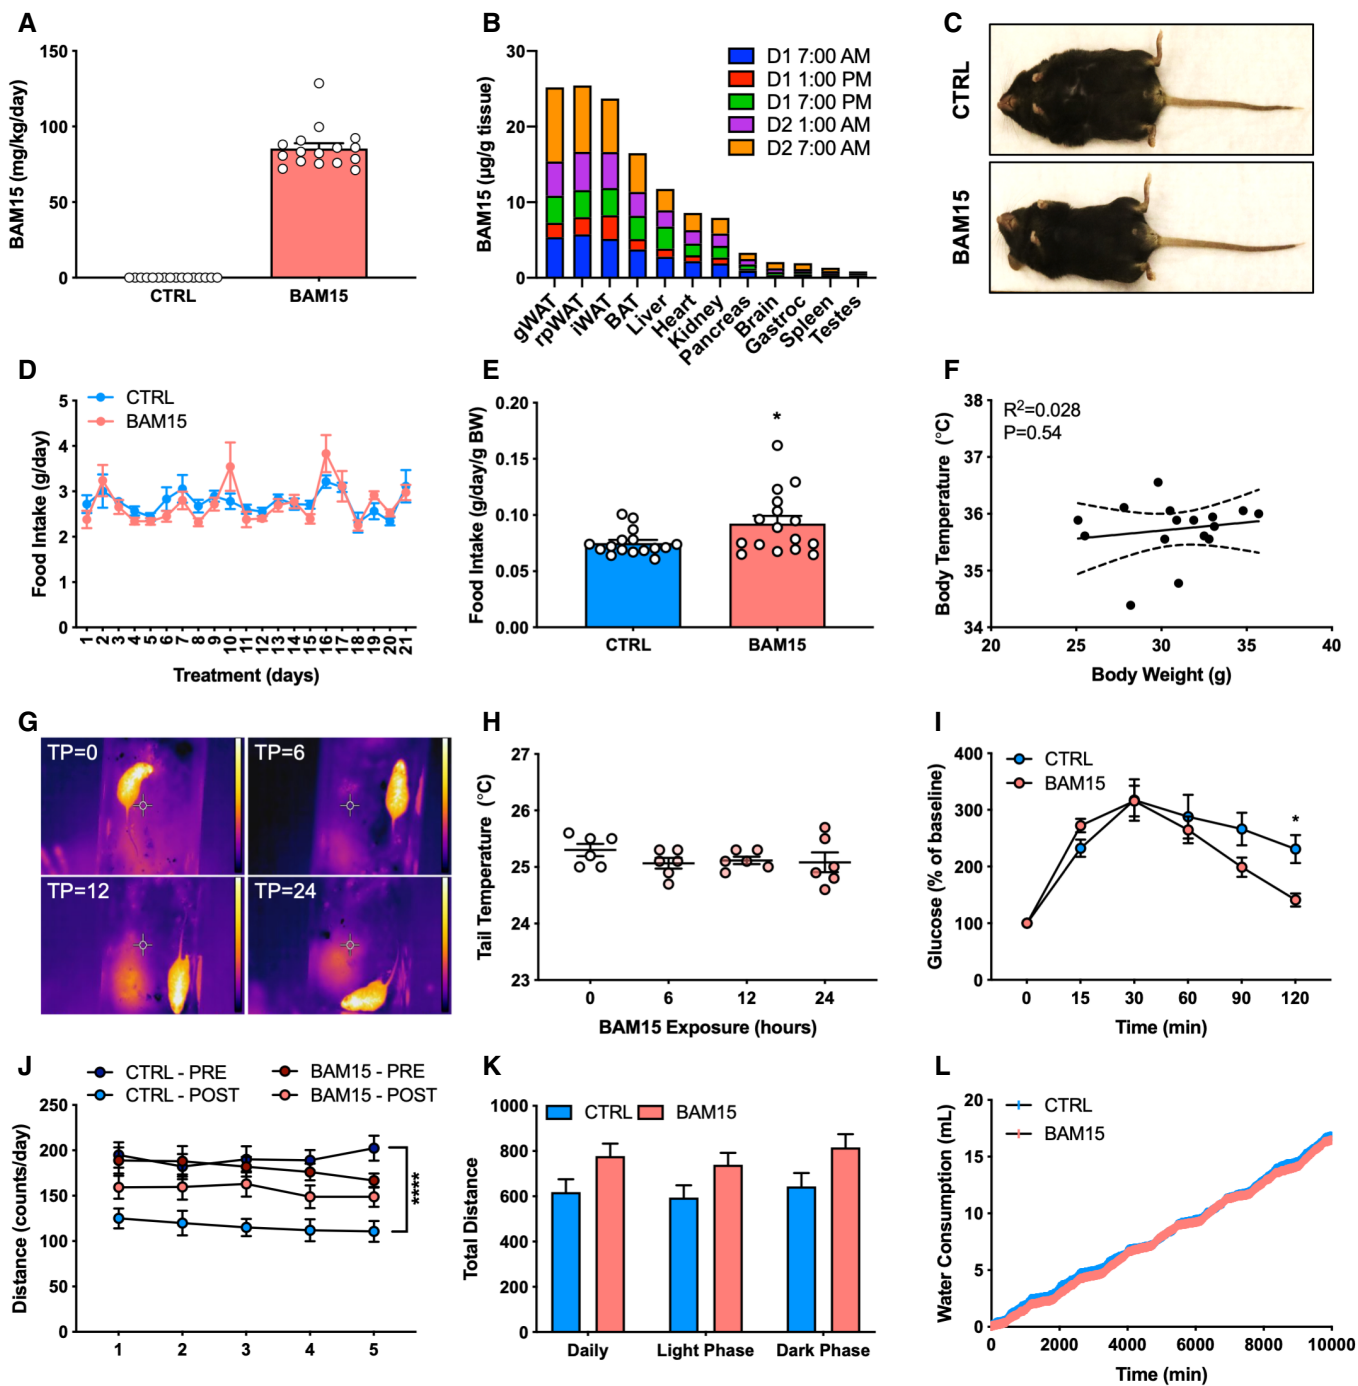

Figure EV2.

**Figure EV2. Related to Fig 4. BAM15 prevents diet-induced obesity by increasing energy expenditure in C57BL/6J mice.**

A Representative image of a CTRL- and BAM15-treated animal at time of necropsy.  
 B, C (B) Daily consumption ( $N = 16$  per group) and (C) tissue distribution of BAM15 over a 24-h feeding period ( $N = 3$  per time point).  
 D, E (D) Daily food intake over the 3-week treatment period ( $N = 16$  per group) and (E) mean food intake expressed relative to body weight ( $N = 16$  per group;  $P = 0.0275$ ).  
 F Relationship between body temperature and weight after 3 weeks of treatment ( $N = 16$ ).  
 G, H (G) Representative thermal image of a mouse exposed to 0, 6, 12, and 24 h of BAM15 (TP = 0, 6, 12, and 24, respectively). Scale bar (right of image) represents 22–32° (dark blue to white) temperature range. (H) Tail heat dissipation of mice exposed to 0, 6, 12, and 24 h of BAM15 ( $N = 6$  per time point).  
 I Glucose concentrations in response to IPGTT expressed as a percent of baseline ( $N = 8$  per group; 120 min:  $P = 0.0413$ ).  
 J–L (J) Daily physical activity before (PRE) and 3 weeks (POST) of CTRL or BAM15 treatment ( $N = 8$  per group; CTRL PRE–POST:  $P < 0.0001$ ) and (K) cumulative physical activity following 3 weeks of CTRL or BAM15 treatment ( $N = 8$  per group). (L) Cumulative water consumption over a 7-day period ( $N = 8$  per group).

Data information: Data are shown as the mean  $\pm$  SEM. \* $P < 0.05$ , \*\*\*\* $P < 0.001$ . Comparisons of treatment  $\times$  time were assessed by two-way repeated-measures ANOVA with Tukey's multiple comparisons. Panels J–L were assessed by a repeated-measures ANOVA with body weight as a covariate. Comparisons of treatment alone were assessed by an unpaired Student's  $t$ -test. Bivariate relationships were determined by linear regression modeling followed by statistical evaluation with Pearson's  $r$ . Dotted lines represent 95% confidence intervals.

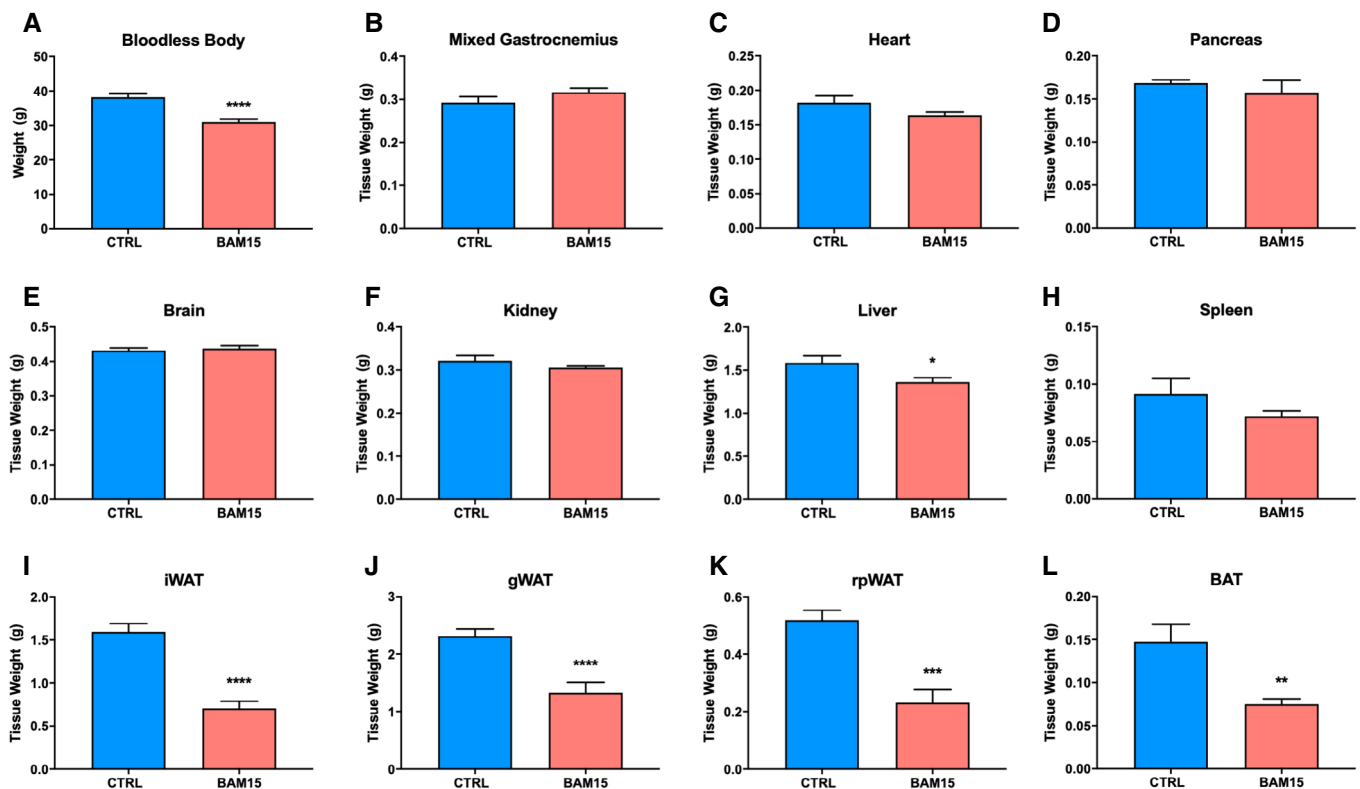**Figure EV3. Related to Fig 4. BAM15 prevents diet-induced obesity by increasing energy expenditure in C57BL/6J mice.**

A–L Organ weights at time of necropsy following 3 weeks of CTRL or BAM15 treatment ( $N = 8$  per group). Data are shown as the mean  $\pm$  SEM. \* $P < 0.05$ , \*\* $P < 0.01$ , \*\*\* $P < 0.001$ , \*\*\*\* $P < 0.0001$ . Comparisons of treatment alone were assessed by an unpaired Student's  $t$ -test. Bloodless body:  $P < 0.0001$ . Liver:  $P = 0.0257$ . iWAT:  $P < 0.0001$ . gWAT:  $P < 0.0001$ . rpWAT:  $P = 0.0002$ . BAT:  $P = 0.0064$ .

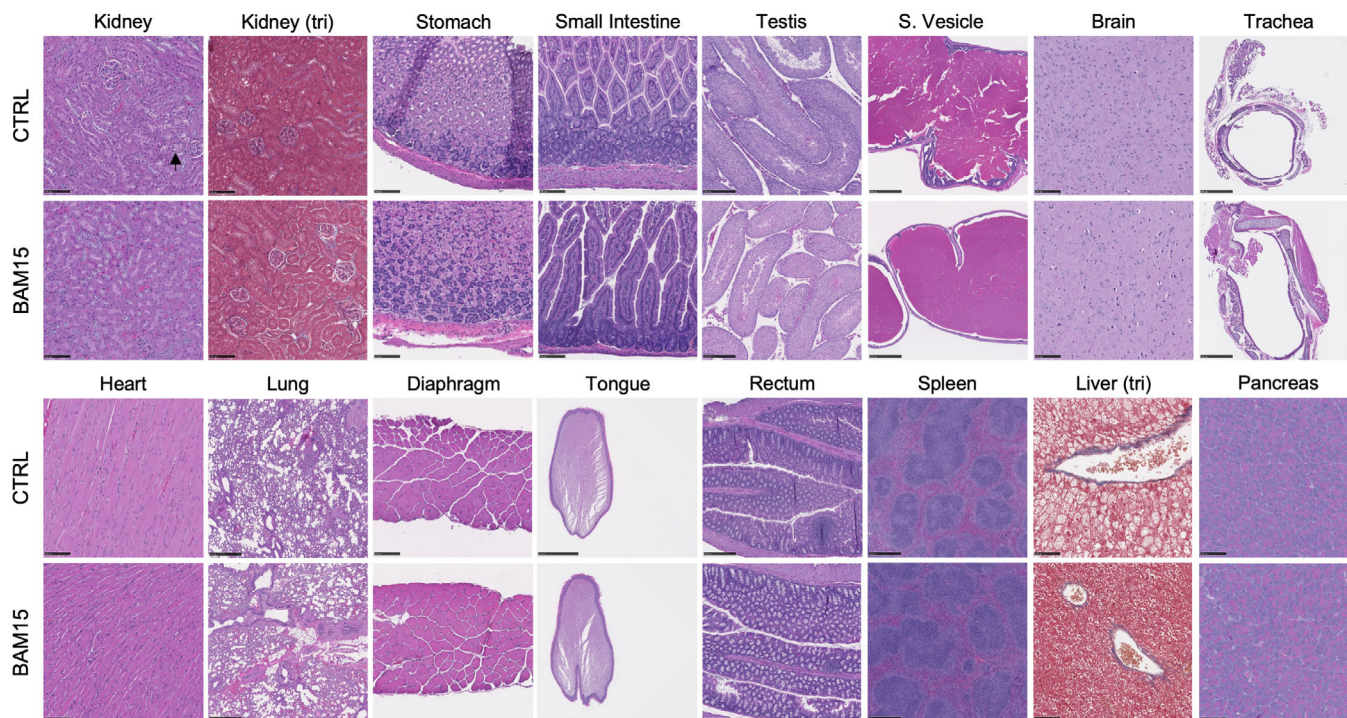

**Figure EV4. Related to Fig 6. BAM15 restricts adipose tissue expansion and lipid deposition to liver and kidney in C57BL/6J mice. Related to Fig 6. BAM15 restricts adipose tissue expansion and lipid deposition to liver and kidney in C57BL/6J mice.**

Representative H&E and trichrome staining of paraffin-embedded tissue sections. Scale bars (black) = 100  $\mu$ m with exception to testis (250  $\mu$ m), seminal vesicles (500  $\mu$ m), trachea (500  $\mu$ m), lung (500  $\mu$ m), tongue (2.5 mm), rectum (250  $\mu$ m), and spleen (500  $\mu$ m). Black arrow represents vacuole formation in the proximal tubules of the kidney. Representative H&E and trichrome staining of paraffin-embedded tissue sections. Scale bars (black) = 100  $\mu$ m with exception to testis (250  $\mu$ m), seminal vesicles (500  $\mu$ m), trachea (500  $\mu$ m), lung (500  $\mu$ m), tongue (2.5 mm), rectum (250  $\mu$ m), and spleen (500  $\mu$ m). Black arrow represents vacuole formation in the proximal tubules of the kidney.

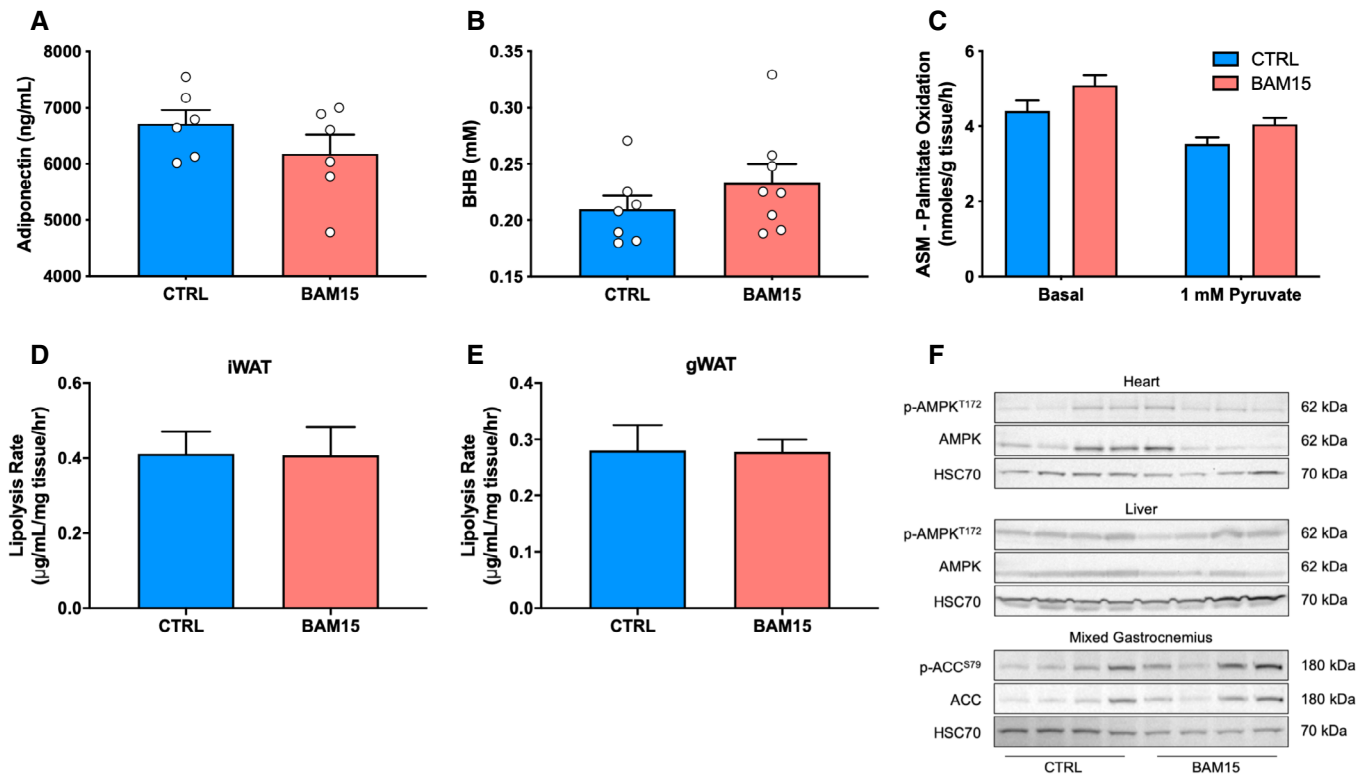

**Figure EV5. Related to Fig 6. BAM15 restricts adipose tissue expansion and lipid deposition to liver and kidney in C57BL/6j mice.**

A, B (A) Circulating adiponectin ( $N = 6$  per group) and (B) beta-hydroxybutyrate (BHB) (CTRL  $N = 7$ , BAM15  $N = 8$ ) concentrations in CTRL- and BAM15-treated animals.

C Fatty acid oxidation attributable to acid-soluble metabolites (ASM) in mixed gastrocnemius muscle  $\pm 1$  mM pyruvate ( $N = 7$  per group).

D, E (D) *Ex vivo* rates of glycerol release from iWAT and (E) gWAT in CTRL- and BAM15-treated animals ( $N = 8$  per group).

F Representative immunoblots of p-AMPK<sup>T172</sup> and AMPK from heart and liver homogenates and p-ACC<sup>S79</sup> and ACC from mixed gastrocnemius muscle.

Data information: Data are shown as the mean  $\pm$  SEM. Main effects of treatment  $\times$  time were assessed by two-way repeated-measures ANOVA with Tukey's post hoc test. Main effects of treatment alone were assessed by unpaired Student's *t*-test.

Source data are available online for this figure.
