# Supplementary material for: BAM15‐mediated mitochondrial uncoupling protects against obesity and improves glycemic control
Source: PubMed Central journal article supplement (PMC7338798; doi:10.15252/emmm.202012088), 2020-06-10

Source Data - Figure 7H

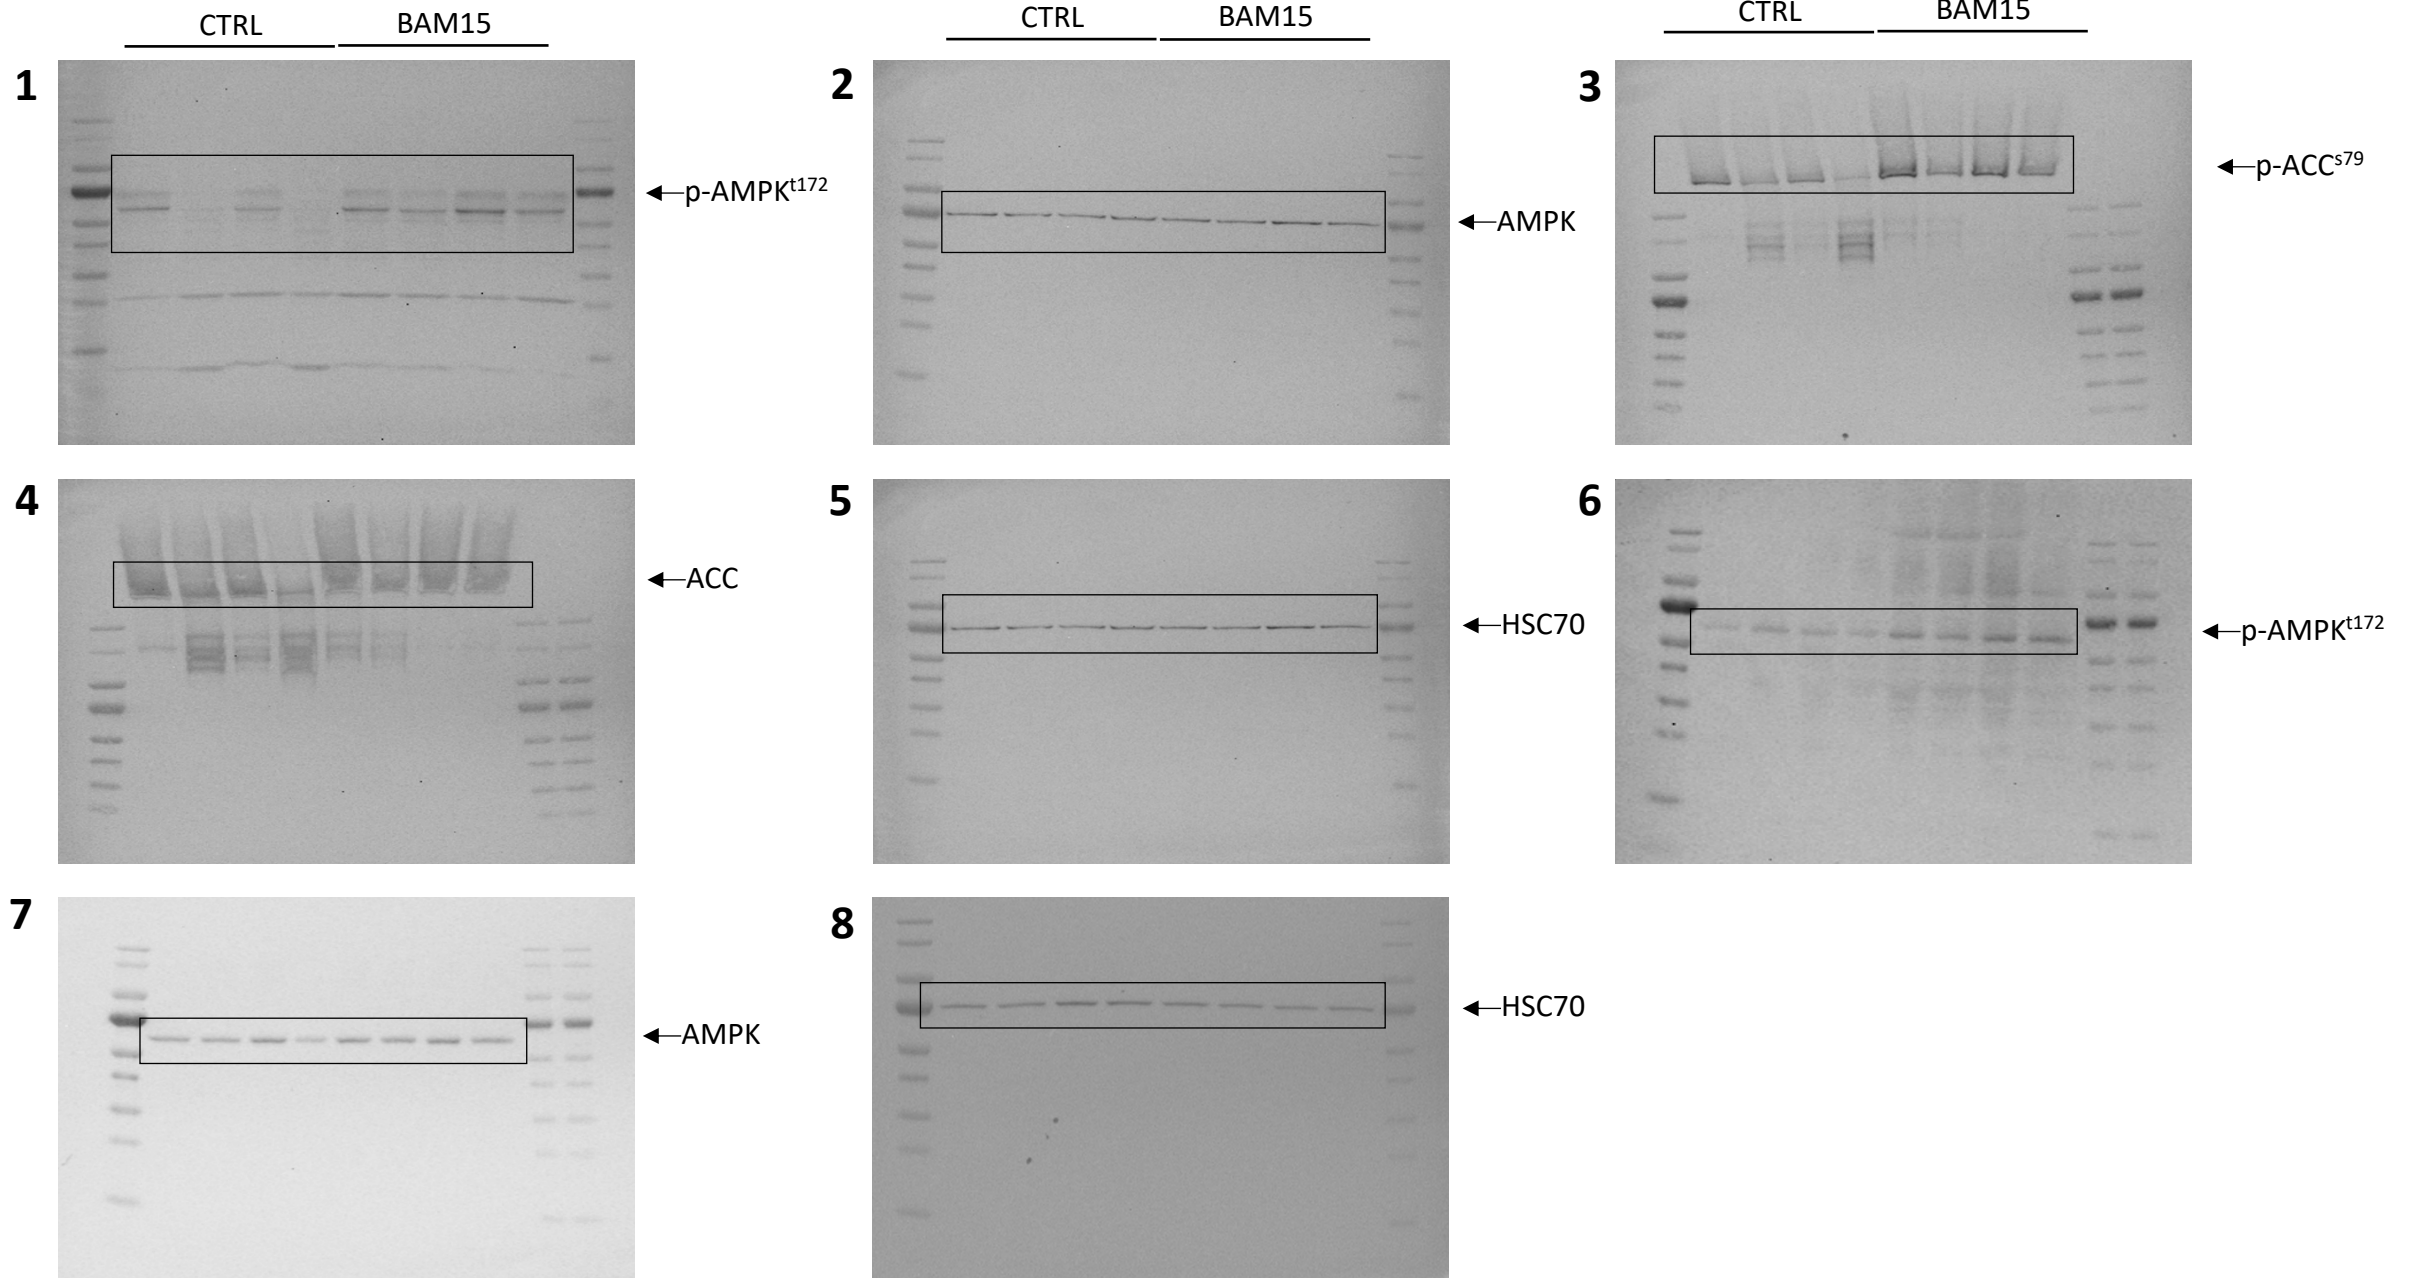

Supplement: EMMM-12-e12088-s004.pdf [file EMMM-12-e12088-s004.pdf]
